# Supplementary material
Source: PubMed Central journal article supplement (PMC3022974)

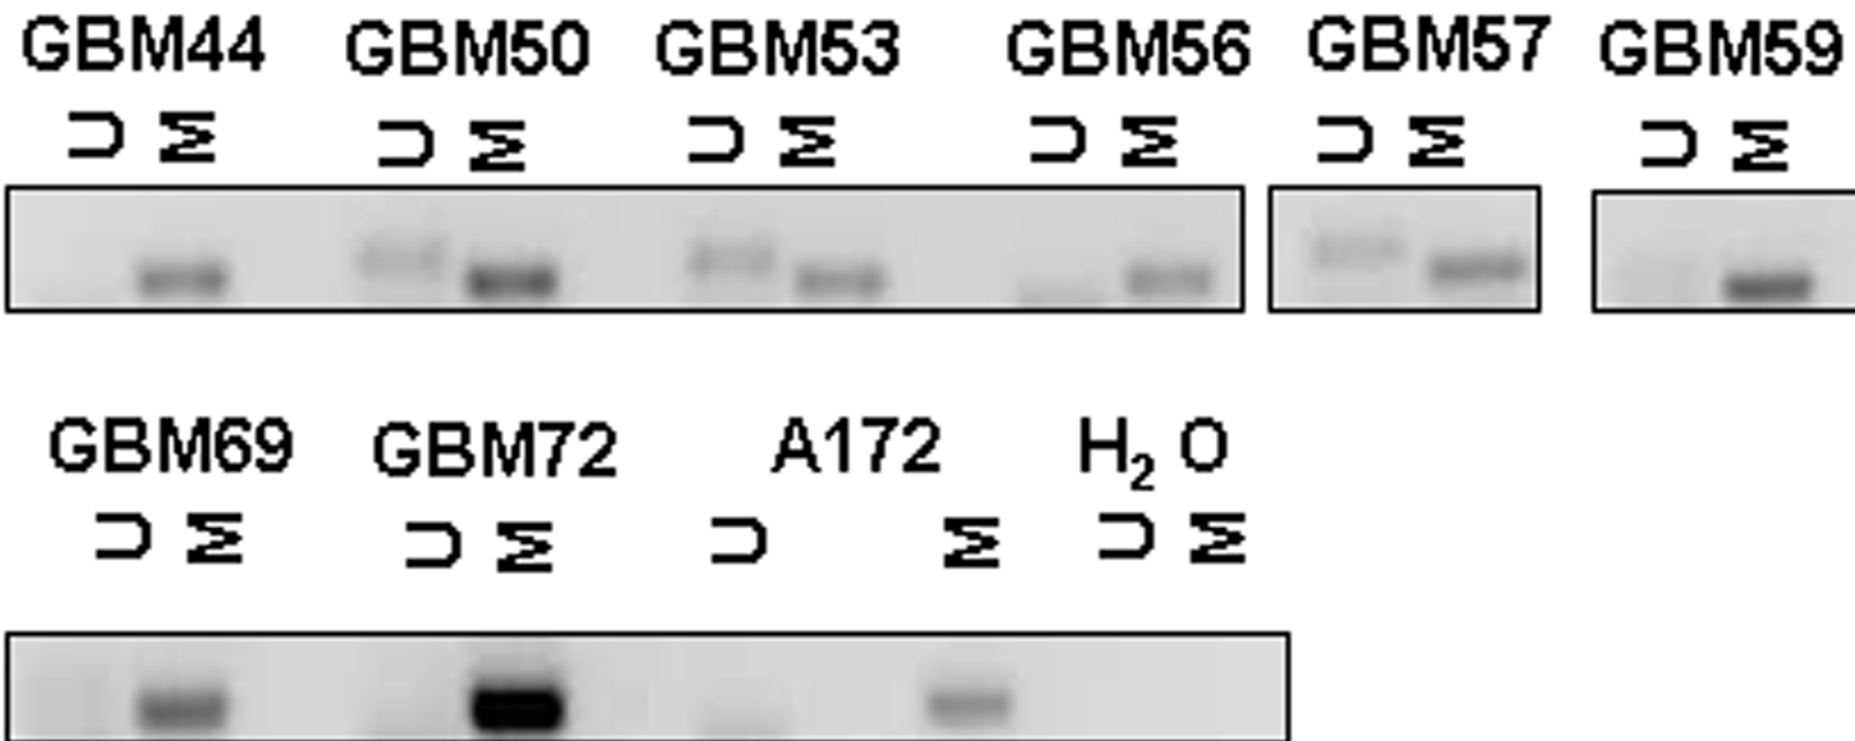

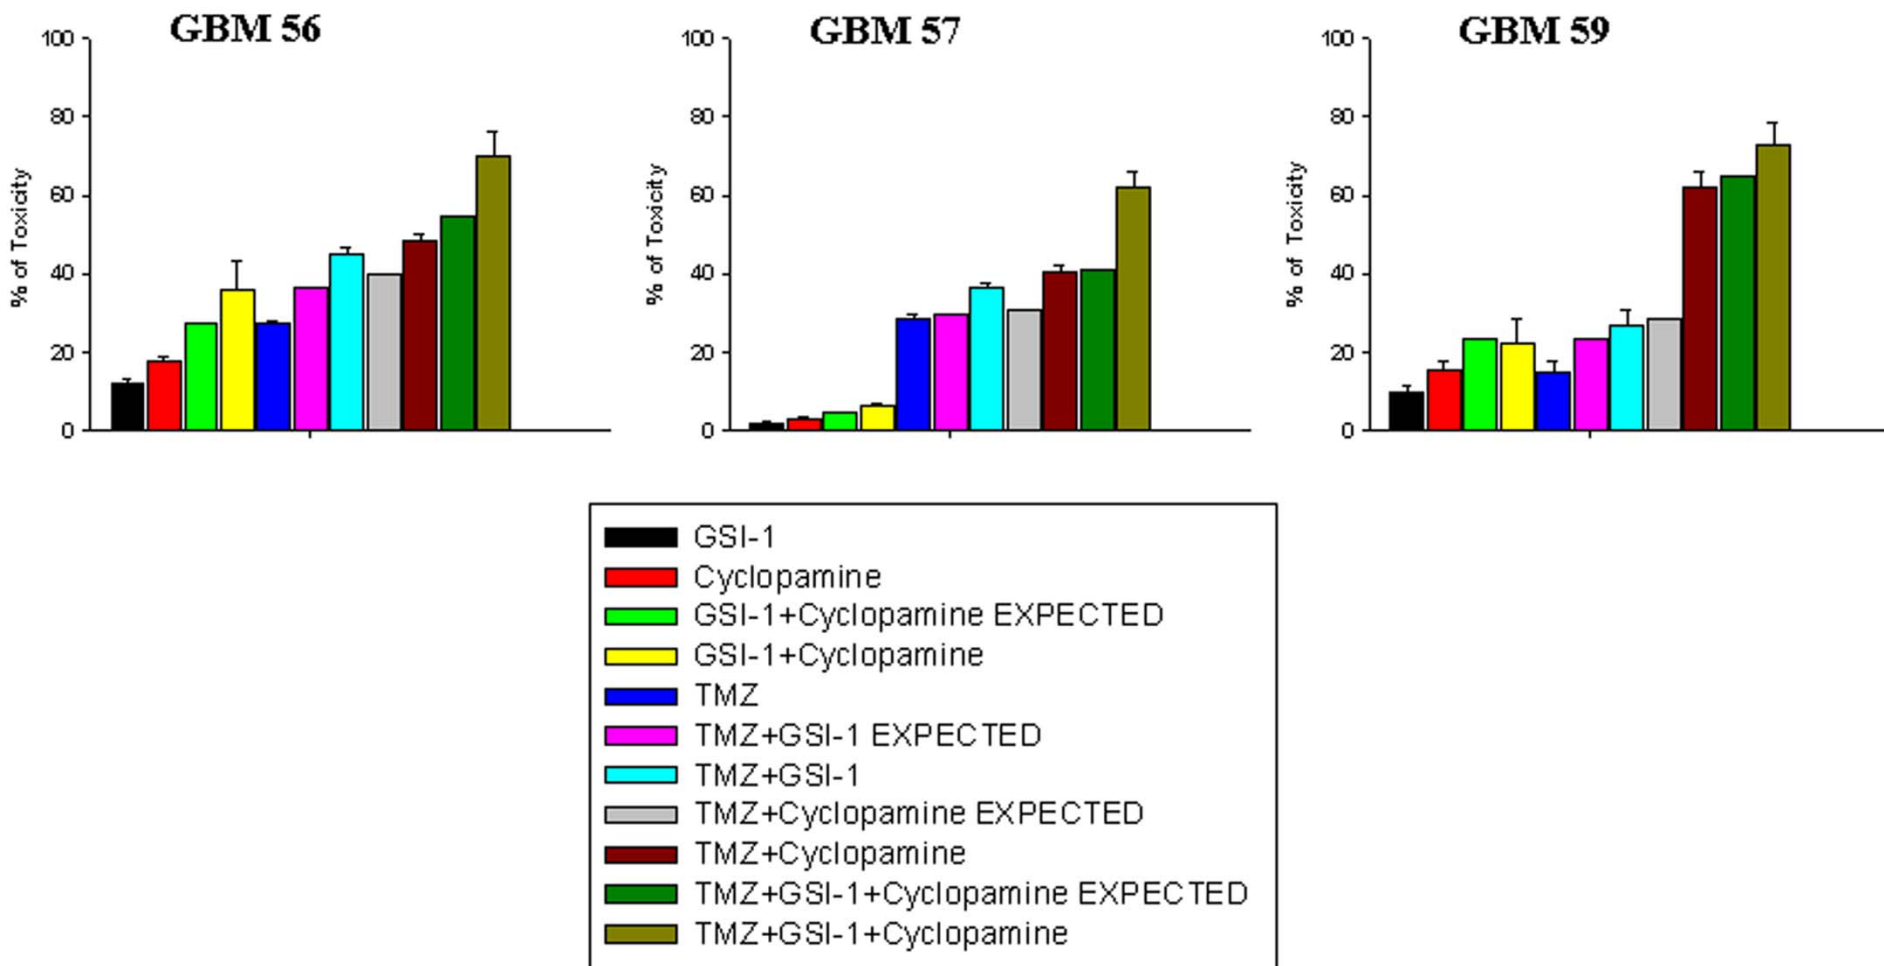

Supplement: 10_62_Ulasov_Suppl.pdf [file 10_62_Ulasov_Suppl.pdf]
